# Supplementary material for: Aggregation caused quenching to aggregation induced emission transformation: a precise tuning based on BN-doped polycyclic aromatic hydrocarbons toward subcellular organelle specific imaging
Source: Royal Society of Chemistry journal article supplement (doi:10.1039/d2sc00380e), 2022-01-01

# Aggregation Caused Quenching to Aggregation Induced Emission Transformation: A Precise Tuning Based on BN-Doped Polycyclic Aromatic Hydrocarbons Toward Subcellular Organelle Specific Imaging

Huanan Huang<sup>\*a</sup>, Lingxiu Liu<sup>b</sup>, Jianguo Wang<sup>\*b</sup>, Ying Zhou<sup>a</sup>, Huanan Hu<sup>a</sup>, Xinglin Ye<sup>a</sup>, Guochang Liu<sup>a</sup>, Zhixiong Xu<sup>a</sup>, Han Xu<sup>\*a</sup>, Wen Yang<sup>a</sup>, Yawei Wang<sup>a</sup>, You Peng<sup>a</sup>, Pinghua Yang<sup>a</sup>, Jianqi Sun<sup>a</sup>, Ping Yan<sup>a</sup>, Xiaohua Cao<sup>\*a</sup>, Ben Zhong Tang<sup>\*c</sup>

<sup>a</sup>. College of Chemistry and Chemical Engineering; Jiangxi Province Engineering Research Center of Ecological Chemical Industry, Jiujiang Key Laboratory of Organosilicon Chemistry and Application, Xinghuo Organosilicon Industry Research Center. Jiujiang University, Jiujiang 332005, China. E-mail: huanan200890@163.com ; tmxuhan@163.com; 910039498@qq.com

<sup>b</sup>. College of Chemistry and Chemical Engineering, Inner Mongolia Key Laboratory of Fine Organic Synthesis, Inner Mongolia University, Hohhot 010021, China. E-mail: wangjg@iccas.ac.cn

<sup>c</sup>. Shenzhen Institute of Molecular Aggregate Science and Engineering, School of Science and Engineering, The Chinese University of Hong Kong, Shenzhen 518172, China. E-mail: tangbenz@ust.hk.

## Contents

|                                                                              |    |
|------------------------------------------------------------------------------|----|
| 1. General Information.....                                                  | 2  |
| 2. Procedures for the Synthesis of BN-BFT and Br-BN-BFT.....                 | 2  |
| 3. General Procedure for the Synthesis of DPA-BN-BFT .....                   | 2  |
| 4. General Procedure for the Synthesis of MeO-DPA-BN-BFT .....               | 3  |
| 5. General Procedure for the Synthesis of DMA-DPA-BN-BFT .....               | 3  |
| 6. Characterization Data for the New Compounds .....                         | 4  |
| 7. The UV–vis spectra of BN-BFT and BFT.....                                 | 5  |
| 8. Calculated NICS and Frontier Orbitals of BN-BFT and BFT.....              | 5  |
| 9. Photophysical properties of BN-BFT, MeO-DPA-BN-BFT.....                   | 7  |
| 10. X-ray Crystallographic Studies of DMA-DPA-BN-BFT and DMA-DPA-BN-BFT..... | 8  |
| 11. DFT Calculations.....                                                    | 12 |
| 12. Reference.....                                                           | 18 |
| 13. Scanned NMR Spectra for the New Compounds.....                           | 19 |

**General Information.** All operations involving air- and moisture-sensitive compounds were carried out under an atmosphere of dry argon by using a modified Schlenk line. All solvents were freshly distilled from Na or CaH<sub>2</sub>. The <sup>1</sup>H, <sup>13</sup>C, <sup>11</sup>B spectra were recorded on a 400 MHz NMR spectrometer. Chemical shifts are referenced against external BF<sub>3</sub>·Et<sub>2</sub>O (<sup>11</sup>B) and tetramethylsilane (TMS). High-resolution mass spectra (HRMS) were obtained on a Varian QFT-ESI spectrometer. The UV-vis spectra were recorded on a RAYLEIGH UV-2100 spectrometer. Fluorescence spectra and quantum yield were performed on Edinburgh Instruments FS5 fluorescence spectrophotometer. A suitable crystal was selected and on a SuperNova, Dual, Cu at zero, AtlasS2 diffractometer. the crystal was kept at 150.00(10) K during data collection during data collection using graphite-monochromated CuK $\alpha$  radiation ( $\lambda = 1.54184\text{\AA}$ ). CCDC numbers: 2099086 (for compound DPA-BN-BFT) , 2099085 (for compound DMA-DPA-BN-BFT). The structures were solved by use of SHELXTL program<sup>S1</sup>. Refinements were performed on *F*<sup>2</sup> anisotropically for all the non-hydrogen atoms by the full-matrix least-squares method. The commercially available catalysts and reagents were purchased from bidepharm.

#### Procedures for the Synthesis of BN-BFT and Br-BN-BFT.

The BN-BFT and Br-BN-BFT were synthesized according to the related synthetic routes. [S2]

#### General Procedure for the Synthesis of DPA-BN-BFT

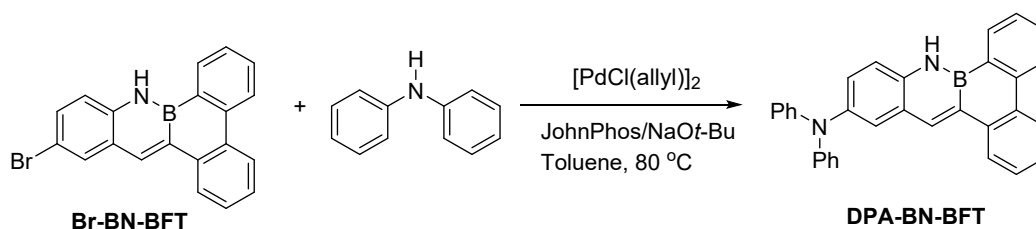

To an oven-dried schlenk tube with a stir bar was added Br-BN-BFT (0.5 mmol, 1 equiv) and diphenylamine (0.6 mmol, 1.2 equiv), [PdCl(allyl)]<sub>2</sub> dimer (0.005 mmol, 1 mol %), JohnPhos (0.01 mmol, 2 mol%), and NaOt-Bu (0.7 mmol, 1.4 equiv). The tube was sealed with schlenk system, evacuated under vacuum, and purged with Ar three times. Toluene (5 mL) was added, the resulting mixture was heated to 80°C and stirred 18 h. The reaction mixture was cooled to rt, and filtered over Celite. The solvent was removed in vacuo, and the product was purified by flash column chromatography on silica gel with hexanes and dichloromethane as the eluent.

#### General Procedure for the Synthesis of Compound MeO-DPA-BN-BFT

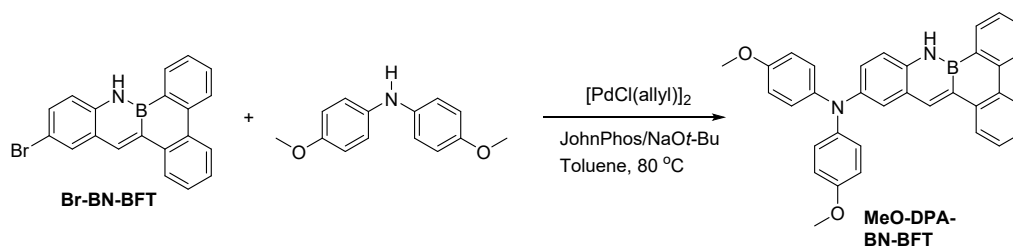

To an oven-dried schlenk tube with a stir bar was added Br-BN-BFT (0.5 mmol, 1 equiv) and methoxy substituted diphenylamine (0.6 mmol, 1.2 equiv), [PdCl(allyl)]<sub>2</sub> dimer (0.01 mmol, 2 mol %), JohnPhos (0.02 mmol, 4 mol%), and NaOt-Bu (0.7 mmol, 1.4 equiv). The tube was sealed with schlenk system, evacuated under vacuum, and purged with Ar three times. Toluene (8 mL) was added, the resulting mixture was heated to 120°C and stirred 18 h. The reaction mixture was cooled to rt, and filtered over Celite. The solvent was removed in vacuo, and the product was purified by flash column chromatography on silica gel with hexanes and dichloromethane as the eluent.

### General Procedure for the Synthesis of Compound DMA-DPA-BN-BFT

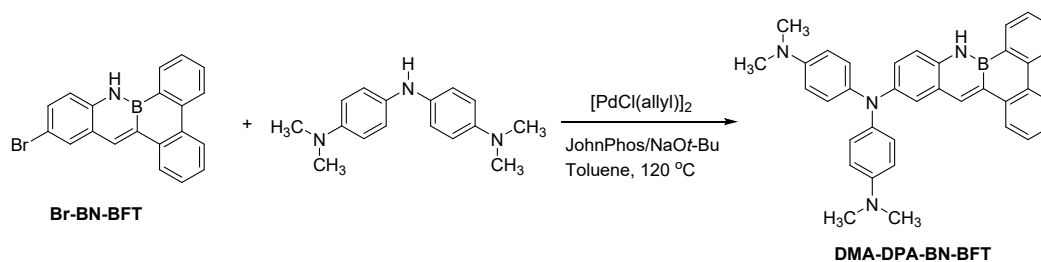

To an oven-dried schlenk tube with a stir bar was added Br-BN-BFT (0.5 mmol, 1 equiv) and bindschedler (0.6 mmol, 1.2 equiv), [PdCl(allyl)]<sub>2</sub> dimer (0.005 mmol, 1 mol %), JohnPhos (0.01 mmol, 2 mol%), and NaOt-Bu (0.7 mmol, 1.4 equiv). The tube was sealed with schlenk system, evacuated under vacuum, and purged with Ar three times. Toluene (8 mL) was added, the resulting mixture was heated to 120°C and stirred 24 h. The reaction mixture was cooled to rt, and filtered over Celite. The solvent was removed in vacuo, and the product was purified by flash column chromatography on silica gel with hexanes and dichloromethane as the eluent.

### Characterization Data for the New Compounds

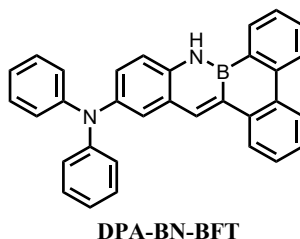

#### N, N-diphenyl-10H-benzo[e]dibenzo[3,4:5,6]borinino[1,2-b][1,2]azaborinin-13-amine

<sup>1</sup>H NMR (400 MHz, CDCl<sub>3</sub>): δ 8.66 (1H, s), 8.50 (1H, s, *NH*), 8.28-8.38 (3H, m), 8.09 (1H, d, *J* = 8 Hz), 7.57-7.61 (2H, m), 7.37-7.45 (3H, m), 7.22-7.31 (6H, m), 7.11-7.13 (4H, m), 6.97-7.01 (2H, m). <sup>13</sup>C NMR (101 MHz, CDCl<sub>3</sub>): δ 148.25, 141.40, 141.23, 136.33, 133.88, 133.45, 130.60, 129.84, 129.38, 127.42, 127.26, 127.17, 126.42, 126.19, 125.77, 125.00, 124.19, 123.53, 123.10, 122.42, 119.30. HRMS: calcd. for [M]<sup>+</sup>: 357.0324, found: 357.0276. The carbons attaching to

boron were not observed.

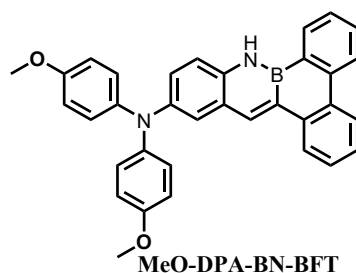

**N,N-bis(4-methoxyphenyl)-10H-benzo[e]dibenzo[3,4:5,6]borinino[1,2-b][1,2]azaborinin-13-amine.**  $^1\text{H}$  NMR (400 MHz,  $\text{CDCl}_3$ ):  $\delta$  8.76 (1H, s), 8.63 (1H, s, *NH*), 8.38-8.47 (3H, m), 8.20 (1H, d,  $J=8\text{Hz}$ ), 7.65 (1H, t,  $J=8\text{Hz}$ ), 7.29-7.51 (6H, m), 7.22-7.31 (6H, m), 6.83-7.06 (8H, m), 6.97-7.01 (2H, m).  $^{13}\text{C}$  NMR (101 MHz,  $\text{CDCl}_3$ ):  $\delta$  155.42, 141.21, 136.49, 135.36, 134.06, 133.46, 130.55, 129.84, 127.20, 127.19, 126.34, 126.23, 125.59, 125.51, 125.05, 124.24, 123.09, 122.49, 118.95, 114.77(overlap), 55.64(-OMe). HRMS: calcd. for  $[\text{M}+\text{H}]^+$ : 507.2244, found: 507.2241. The carbons attaching to boron were not observed.

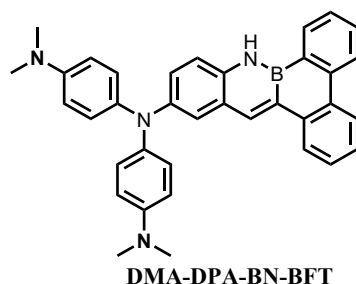

**N1-(10H-benzo[e]dibenzo[3,4:5,6]borinino[1,2-b][1,2]azaborinin-13-yl)-N1-(4-(dimethylamino)phenyl)-N4,N4-dimethylbenzene-1,4-diamine.**  $^1\text{H}$  NMR (400 MHz,  $\text{THF}-d_8$ ):  $\delta$  10.22 (1H, s), 8.88 (1H, s, *NH*), 8.41-8.50 (4H, m), 7.54-7.58 (1H, m), 7.49-7.51 (1H, m), 7.35-7.49 (4H, m), 7.21 (1H, b), 6.97 (4H, m), 6.66-6.68 (4H, m), 2.52 (12H, m).  $^{13}\text{C}$  NMR (Solid-state nuclear magnetic):  $\delta$  146.33, 145.26, 141.44, 140.02, 137.51, 135.59, 133.72, 132.22, 129.10, 128.14, 126.72, 124.51, 123.80, 119.40, 117.66, 112.38, 111.27, 39.40 (- $\text{N}(\text{CH}_3)_2$ ). HRMS: calcd. for  $[\text{M}]^+$ : 532.2798, found: 532.2798. The carbons attaching to boron were not observed.

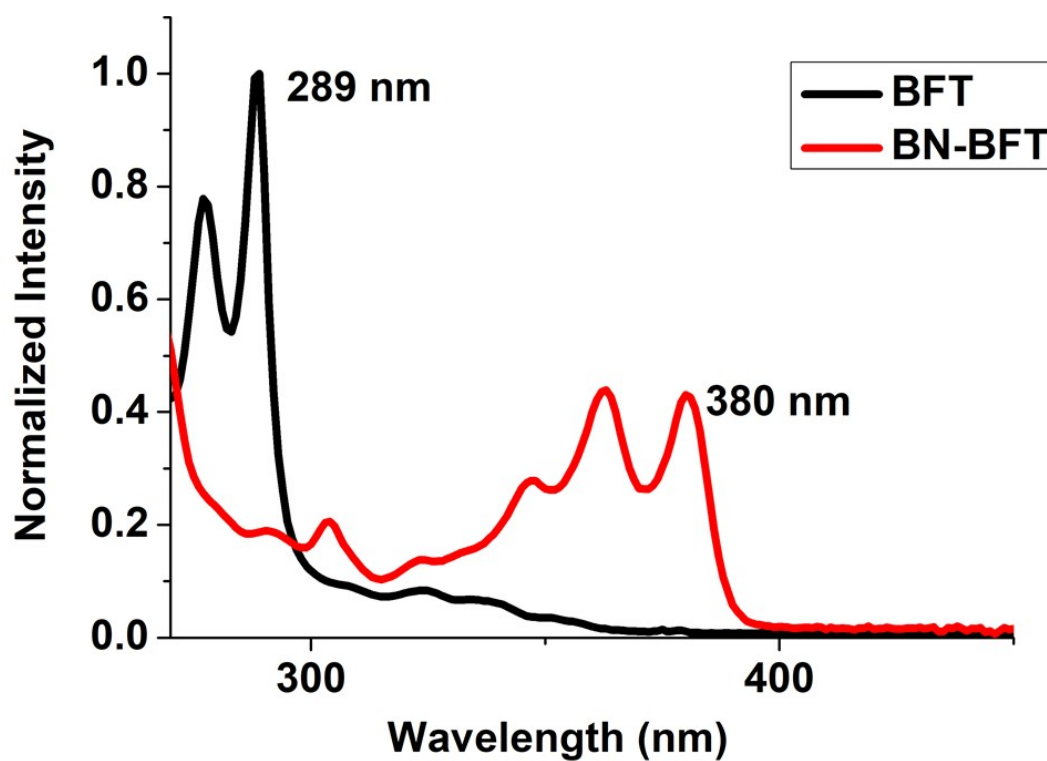

**Figure S1.** The UV-vis spectra of BN-BFT and BFT in  $\text{CH}_2\text{Cl}_2$  (Concentration =  $10^{-5}$  M)

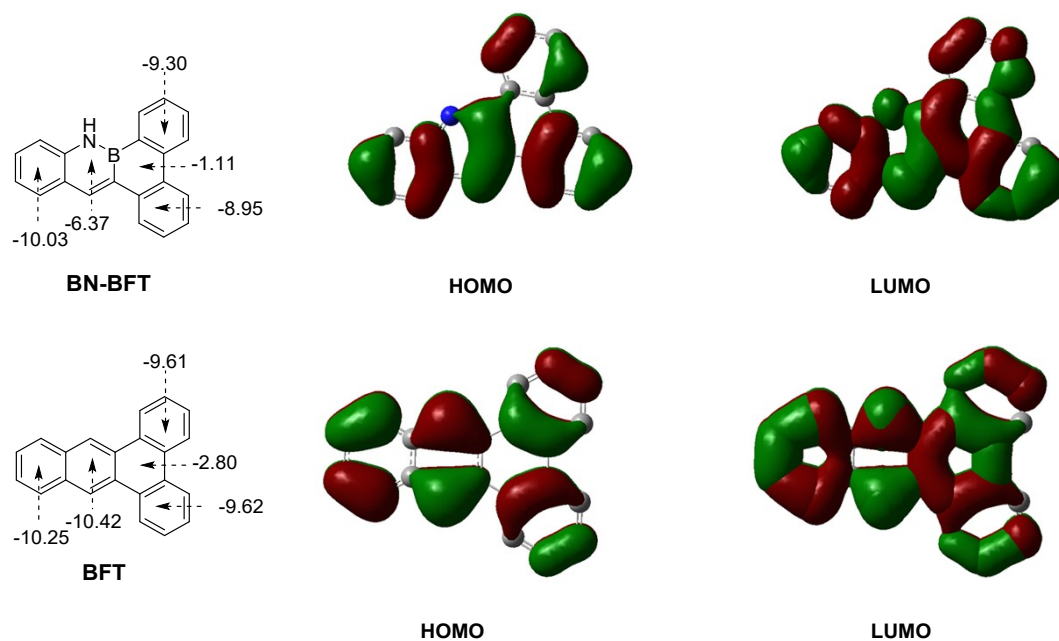

**Figure S2.** Calculated NICS ( $1_{zz}$ ) values (in ppm, calculated at the GLAO-B3LYP16-311+G (d, p) level), and the electronic distribution of HOMO and LUMO BN-BFT (up) and its hydrocarbon analogue BFT (down).

**Table S1.** The summary data of dual descriptor evaluation.

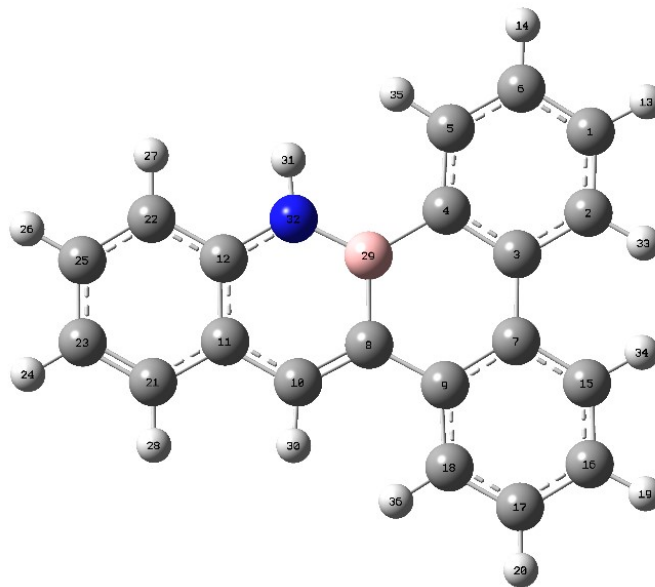

| atoms | Atom No. | $q_N$    | $q_{N-1}$ | $q_{N+1}$ | $\Delta f$ |
|-------|----------|----------|-----------|-----------|------------|
| C     | 1        | -0.22462 | -0.09891  | -0.15649  | -0.19384   |
| C     | 2        | -0.22101 | -0.12711  | -0.10441  | -0.2105    |
| C     | 5        | -0.19265 | -0.09885  | -0.10737  | -0.17908   |
| C     | 6        | -0.24199 | -0.12591  | -0.14352  | -0.21455   |
| C     | 10       | -0.12905 | -0.07468  | -0.28368  | 0.10026    |
| C     | 15       | -0.21522 | -0.0772   | -0.09762  | -0.25562   |
| C     | 16       | -0.23747 | -0.15362  | -0.17757  | -0.14375   |
| C     | 17       | -0.23524 | -0.09755  | -0.1313   | -0.24163   |
| C     | 18       | -0.21503 | -0.12135  | -0.12918  | -0.17953   |
| C     | 21       | -0.20014 | -0.10866  | -0.2011   | -0.09052   |
| C     | 22       | -0.27086 | -0.11146  | -0.16377  | -0.26649   |
| C     | 23       | -0.26292 | -0.11459  | -0.11578  | -0.29547   |
| C     | 25       | -0.21794 | -0.13349  | -0.20356  | -0.09883   |

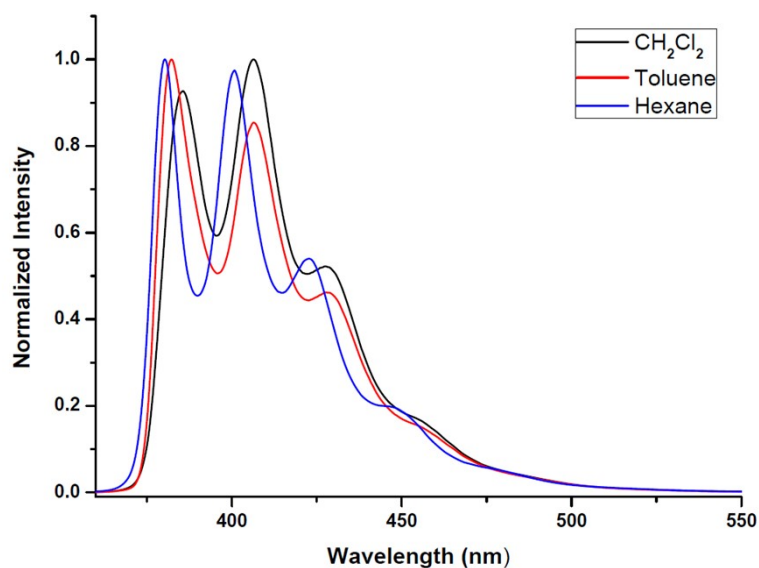

**Figure S3.** Normalized fluorescence emission spectra of BN-BFT in  $\text{CH}_2\text{Cl}_2$ , *n*-hexane and toluene, respectively. All experiments upon excitation at the absorption maximum wavelength.<sup>S2</sup>

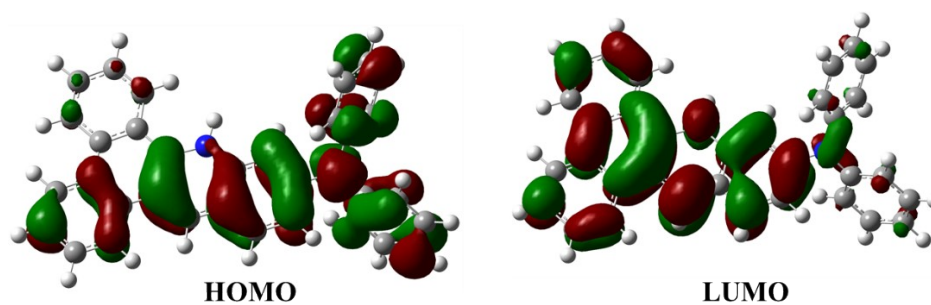

**Figure S4.** Calculated frontier orbitals of DPA-BN-BFT.

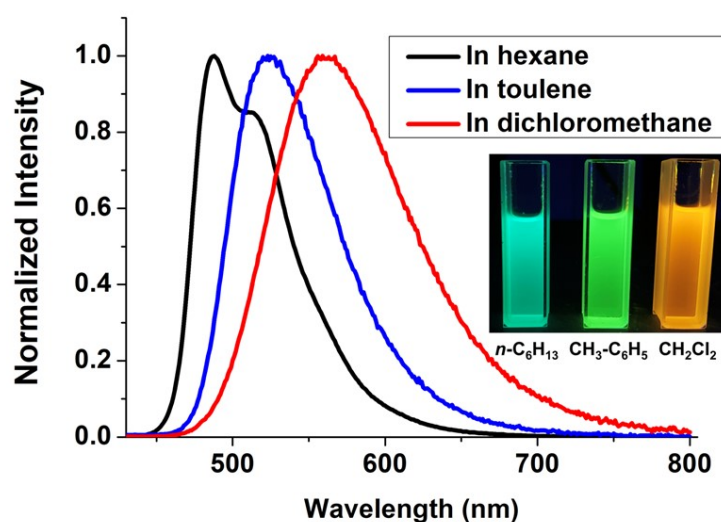

**Figure S5.** Normalized solvent-dependent fluorescence spectra of MeO-DPA-BN-BFT in *n*-hexane (black), toluene (red), dichloromethane (blue) solutions at  $10^{-6}$  M (Inset: Fluorescent photographs of MeO-DPA-BN-BFT in different solvents).

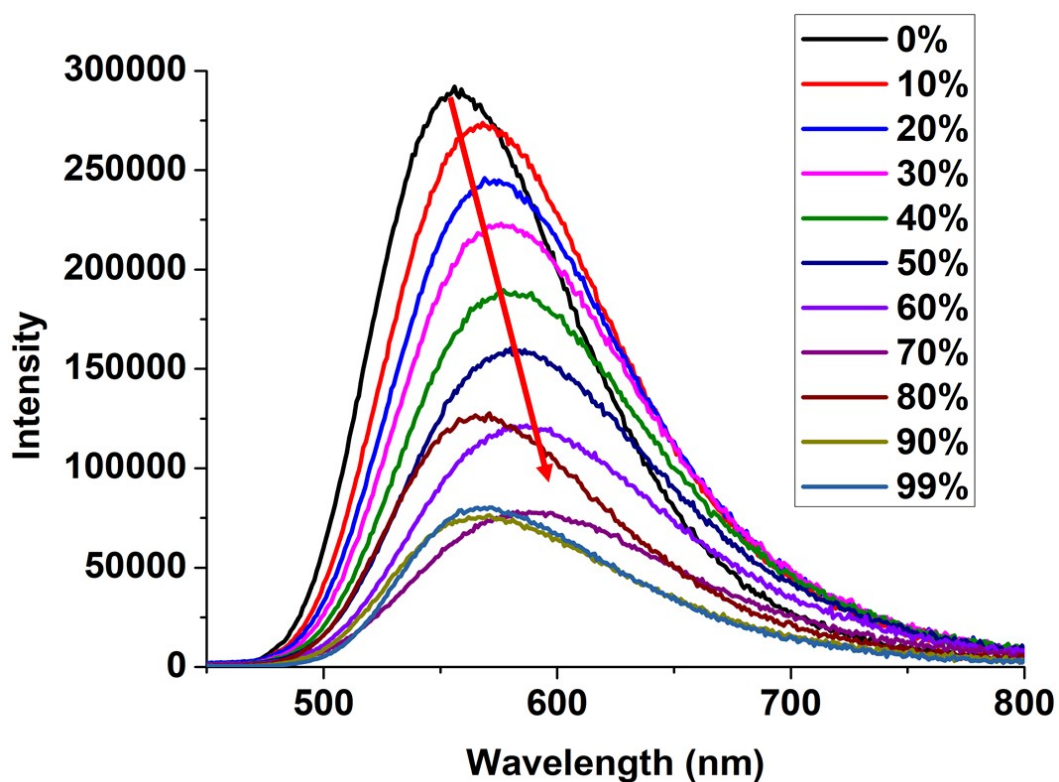

**Figure S6.** PL spectra of MeO-DPA-BN-BFT in THF/water mixtures with different water fractions (fw), excitation wavelength: 420 nm.

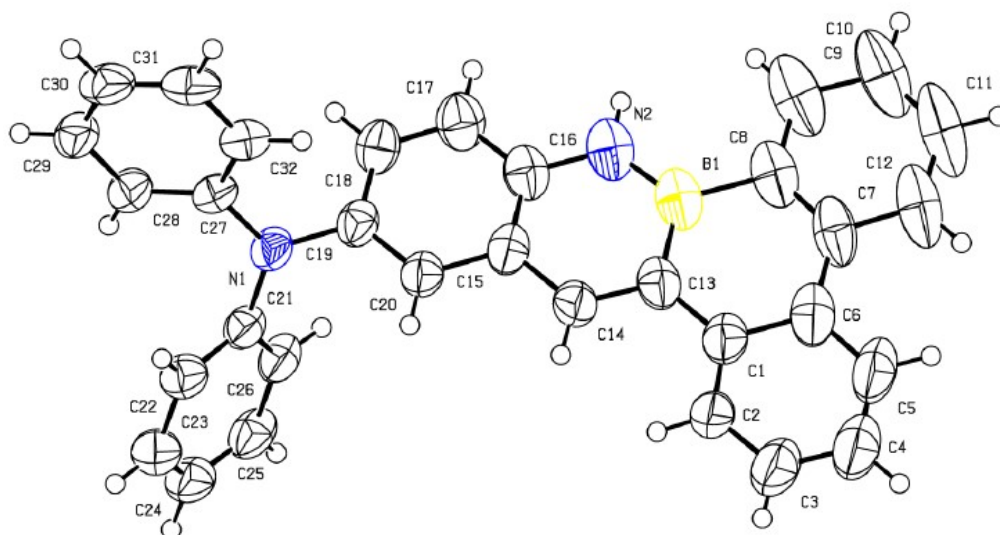

**Figure S7.** Molecular structure of DPA-BN-BFT

**Table S2** Crystal data and structure refinement for DPA-BN-BFT

|                     |                    |
|---------------------|--------------------|
| Identification code | DPA-BN-BFT         |
| Empirical formula   | $C_{32}H_{23}BN_2$ |



|                                                   |                                                               |
|---------------------------------------------------|---------------------------------------------------------------|
| <b>Formula weight</b>                             | 446.33                                                        |
| <b>Temperature/K</b>                              | 150.00(10)                                                    |
| <b>Crystal system</b>                             | monoclinic                                                    |
| <b>Space group</b>                                | P2 <sub>1</sub> /c                                            |
| <b>a/Å</b>                                        | 8.1281(4)                                                     |
| <b>b/Å</b>                                        | 14.6359(10)                                                   |
| <b>c/Å</b>                                        | 22.9977(13)                                                   |
| <b>α/°</b>                                        | 90                                                            |
| <b>β/°</b>                                        | 93.688(5)                                                     |
| <b>γ/°</b>                                        | 90                                                            |
| <b>Volume/Å<sup>3</sup></b>                       | 2730.2(3)                                                     |
| <b>Z</b>                                          | 4                                                             |
| <b>ρ<sub>calc</sub>/g/cm<sup>3</sup></b>          | 1.086                                                         |
| <b>μ/mm<sup>-1</sup></b>                          | 0.480                                                         |
| <b>F(000)</b>                                     | 936.0                                                         |
| <b>Crystal size/mm<sup>3</sup></b>                | 0.14 × 0.12 × 0.1                                             |
| <b>Radiation</b>                                  | Cu Kα (λ = 1.54184)                                           |
| <b>2θ range for data collection/°</b>             | 7.164 to 133.192                                              |
| <b>Index ranges</b>                               | -9 ≤ h ≤ 9, -16 ≤ k ≤ 17, -19 ≤ l ≤ 27                        |
| <b>Reflections collected</b>                      | 10196                                                         |
| <b>Independent reflections</b>                    | 4826 [R <sub>int</sub> = 0.0251, R <sub>sigma</sub> = 0.0253] |
| <b>Data/restraints/parameters</b>                 | 4826/7/317                                                    |
| <b>Goodness-of-fit on F<sup>2</sup></b>           | 1.015                                                         |
| <b>Final R indexes [I &gt;= 2σ (I)]</b>           | R <sub>1</sub> = 0.0933, wR <sub>2</sub> = 0.2568             |
| <b>Final R indexes [all data]</b>                 | R <sub>1</sub> = 0.1053, wR <sub>2</sub> = 0.2696             |
| <b>Largest diff. peak/hole / e Å<sup>-3</sup></b> | 0.67/-0.25                                                    |

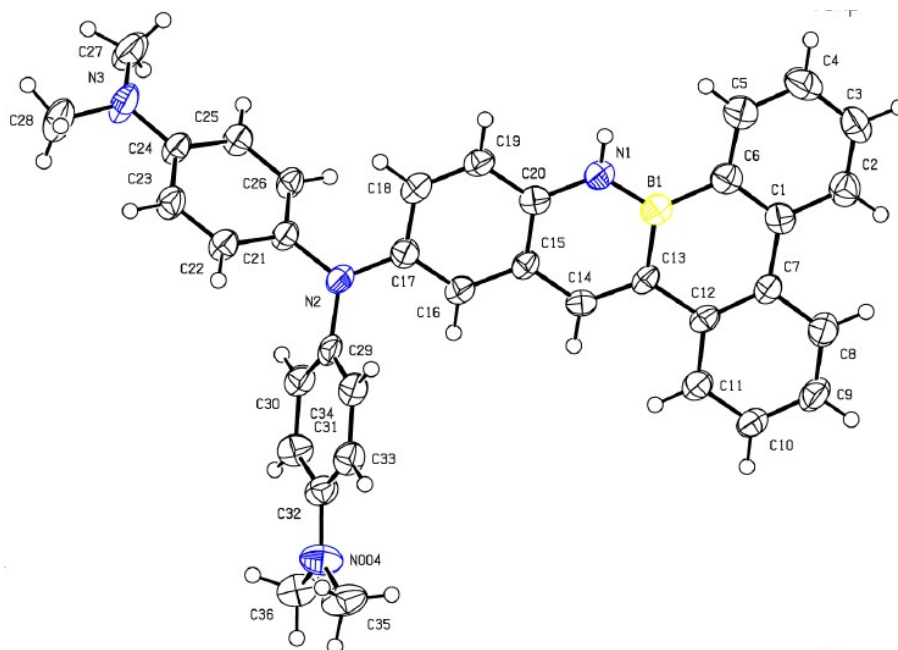

**Figure S8.** Molecular structure of DMA-DPA-BN-BFT

**Table S3** Crystal data and structure refinement for DMA-DPA-BN-BFT

| Identification code                     | DMA-DPA-BN-BFT                                  |
|-----------------------------------------|-------------------------------------------------|
| Empirical formula                       | C <sub>36</sub> H <sub>33</sub> BN <sub>4</sub> |
| Formula weight                          | 532.47                                          |
| Temperature/K                           | 149.99(10)                                      |
| Crystal system                          | monoclinic                                      |
| Space group                             | P2 <sub>1</sub> /n                              |
| a/Å                                     | 14.3480(15)                                     |
| b/Å                                     | 9.7155(7)                                       |
| c/Å                                     | 20.1083(19)                                     |
| $\alpha$ /°                             | 90                                              |
| $\beta$ /°                              | 95.494(9)                                       |
| $\gamma$ /°                             | 90                                              |
| Volume/Å <sup>3</sup>                   | 2790.2(4)                                       |
| Z                                       | 4                                               |
| $\rho_{\text{calc}}$ /g/cm <sup>3</sup> | 1.268                                           |
| $\mu$ /mm <sup>-1</sup>                 | 0.572                                           |
| F(000)                                  | 1128.0                                          |
| Crystal size/mm <sup>3</sup>            | 0.12 × 0.11 × 0.09                              |
| Radiation                               | Cu K $\alpha$ ( $\lambda$ = 1.54184)            |

|                                                                             |                                                                    |
|-----------------------------------------------------------------------------|--------------------------------------------------------------------|
| <b>2<math>\theta</math> range for data collection/<math>^{\circ}</math></b> | 7.252 to 133.198                                                   |
| <b>Index ranges</b>                                                         | $-17 \leq h \leq 16$ , $-11 \leq k \leq 11$ , $-20 \leq l \leq 23$ |
| <b>Reflections collected</b>                                                | 4941                                                               |
| <b>Independent reflections</b>                                              | 4941 [ $R_{\text{int}} = 0.0560$ , $R_{\text{sigma}} = 0.0659$ ]   |
| <b>Data/restraints/parameters</b>                                           | 4941/0/375                                                         |
| <b>Goodness-of-fit on <math>F^2</math></b>                                  | 1.058                                                              |
| <b>Final R indexes [<math>I \geq 2\sigma(I)</math>]</b>                     | $R_1 = 0.1150$ , $wR_2 = 0.3236$                                   |
| <b>Final R indexes [all data]</b>                                           | $R_1 = 0.1400$ , $wR_2 = 0.3393$                                   |
| <b>Largest diff. peak/hole / <math>e \text{ \AA}^{-3}</math></b>            | 0.44/-0.40                                                         |

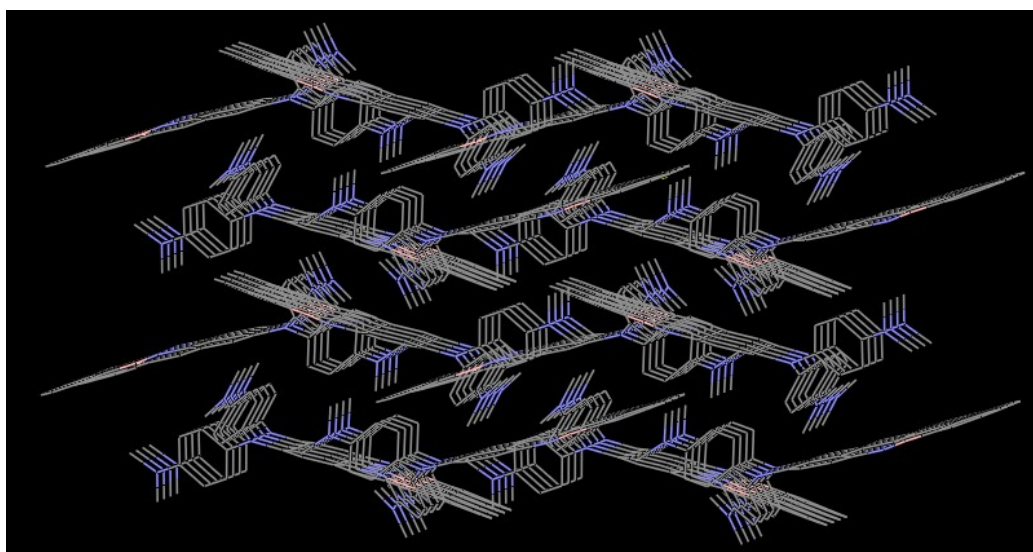

*Figure S9.* Molecular packing arrangement of DMA-DPA-BN-BFT

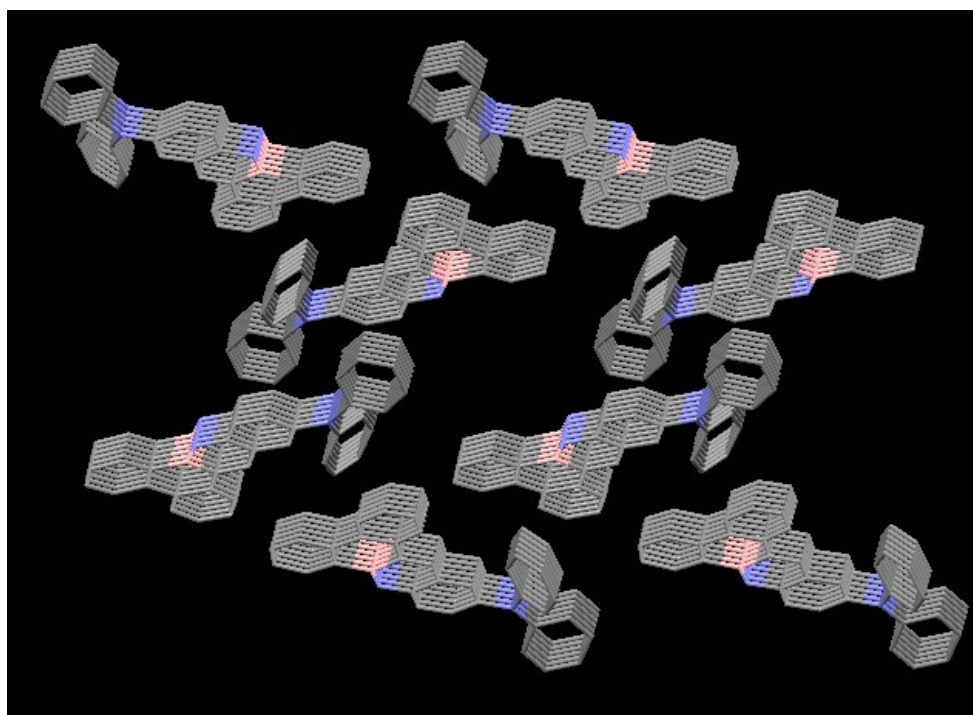

**Figure S10.** Molecular packing arrangement of DPA-BN-BFT

**Table S4.** Cartesian coordinates of BN-BFT for NICS and frontier orbitals calculations

| Center Number | Atomic Number | Atomic Type | Coordinates(Angstroms) |           |           |
|---------------|---------------|-------------|------------------------|-----------|-----------|
|               |               |             | X                      | Y         | Z         |
| 1             | 6             | 0           | -1.955330              | -0.098743 | -0.110357 |
| 2             | 6             | 0           | 0.142261               | 1.183985  | 0.202714  |
| 3             | 6             | 0           | -0.509051              | 2.366432  | 0.602950  |
| 4             | 6             | 0           | 1.547056               | 1.214425  | -0.017110 |
| 5             | 6             | 0           | 2.315401               | -0.026984 | -0.200735 |
| 6             | 6             | 0           | 1.694735               | -1.253071 | 0.143608  |
| 7             | 6             | 0           | 3.654943               | -0.031310 | -0.636735 |
| 8             | 6             | 0           | 2.198991               | 2.461884  | 0.059746  |
| 9             | 6             | 0           | 1.529334               | 3.632720  | 0.377833  |
| 10            | 6             | 0           | 0.166523               | 3.575699  | 0.679292  |
| 11            | 1             | 0           | -0.367166              | 4.466632  | 0.996188  |
| 12            | 1             | 0           | 2.070278               | 4.572151  | 0.434179  |
| 13            | 6             | 0           | -2.686676              | -1.263073 | 0.261104  |
| 14            | 6             | 0           | -2.007016              | -2.428602 | 0.772059  |
| 15            | 6             | 0           | -0.653238              | -2.512313 | 0.777064  |
| 16            | 1             | 0           | -2.636467              | -3.259405 | 1.090168  |
| 17            | 6             | 0           | 2.460049               | -2.434729 | 0.097041  |
| 18            | 6             | 0           | 4.381232               | -1.213893 | -0.684668 |
| 19            | 1             | 0           | 5.412910               | -1.196424 | -1.024837 |
| 20            | 6             | 0           | 3.789957               | -2.424344 | -0.301471 |

|    |   |   |           |           |           |
|----|---|---|-----------|-----------|-----------|
| 21 | 1 | 0 | 4.362745  | -3.346564 | -0.333554 |
| 22 | 1 | 0 | 3.271958  | 2.500234  | -0.088112 |
| 23 | 1 | 0 | 4.133408  | 0.888860  | -0.954235 |
| 24 | 1 | 0 | -1.553429 | 2.328448  | 0.882884  |
| 25 | 1 | 0 | -0.195201 | -3.442391 | 1.106256  |
| 26 | 1 | 0 | 1.991526  | -3.379395 | 0.357933  |
| 27 | 7 | 0 | -0.564217 | -0.053004 | 0.139272  |
| 28 | 5 | 0 | 0.168563  | -1.284654 | 0.381342  |
| 29 | 6 | 0 | -2.636859 | 0.920084  | -0.808167 |
| 30 | 6 | 0 | -4.080083 | -1.296340 | 0.043577  |
| 31 | 6 | 0 | -4.743928 | -0.256717 | -0.582529 |
| 32 | 1 | 0 | -5.815309 | -0.306505 | -0.748922 |
| 33 | 6 | 0 | -4.002952 | 0.842728  | -1.036974 |
| 34 | 1 | 0 | -2.084242 | 1.764851  | -1.197707 |
| 35 | 1 | 0 | -4.492748 | 1.641247  | -1.586388 |
| 36 | 1 | 0 | -4.623650 | -2.184472 | 0.355069  |

**Table S5.** Cartesian coordinates of BFT for NICS and frontier orbitals calculations

| Center Number | Atomic Number | Atomic Type | Coordinates(Angstroms) |           |           |
|---------------|---------------|-------------|------------------------|-----------|-----------|
|               |               |             | X                      | Y         | Z         |
| 1             | 6             | 0           | 2.003134               | -0.056984 | -0.090143 |
| 2             | 6             | 0           | -0.198290              | 1.243632  | 0.133682  |
| 3             | 6             | 0           | 0.409509               | 2.479879  | 0.464367  |
| 4             | 6             | 0           | -1.614114              | 1.221376  | -0.026689 |
| 5             | 6             | 0           | -2.307541              | -0.057550 | -0.160484 |
| 6             | 6             | 0           | -1.588890              | -1.260105 | 0.078489  |
| 7             | 6             | 0           | -3.684229              | -0.137153 | -0.465203 |
| 8             | 6             | 0           | -2.324593              | 2.440748  | 0.026173  |
| 9             | 6             | 0           | -1.690818              | 3.644821  | 0.274188  |
| 10            | 6             | 0           | -0.312782              | 3.658351  | 0.525733  |
| 11            | 1             | 0           | 0.187652               | 4.584221  | 0.793348  |
| 12            | 1             | 0           | -2.267773              | 4.563737  | 0.317213  |
| 13            | 6             | 0           | 2.704740               | -1.263461 | 0.229976  |
| 14            | 6             | 0           | 1.960726               | -2.414119 | 0.612947  |
| 15            | 6             | 0           | 0.597356               | -2.406068 | 0.562938  |
| 16            | 1             | 0           | 2.496079               | -3.318086 | 0.890330  |
| 17            | 6             | 0           | -2.297107              | -2.483743 | 0.045560  |
| 18            | 6             | 0           | -4.351162              | -1.348255 | -0.499143 |
| 19            | 1             | 0           | -5.409817              | -1.378401 | -0.738841 |
| 20            | 6             | 0           | -3.651502              | -2.532994 | -0.230108 |
| 21            | 1             | 0           | -4.163767              | -3.490103 | -0.256213 |
| 22            | 1             | 0           | -3.402046              | 2.437834  | -0.087370 |
| 23            | 1             | 0           | -4.237632              | 0.766549  | -0.691563 |

|    |   |   |           |           |           |
|----|---|---|-----------|-----------|-----------|
| 24 | 1 | 0 | 1.458250  | 2.500237  | 0.727536  |
| 25 | 1 | 0 | 0.063160  | -3.317432 | 0.800615  |
| 26 | 1 | 0 | -1.772255 | -3.417159 | 0.207110  |
| 27 | 6 | 0 | 2.767430  | 0.996879  | -0.663672 |
| 28 | 6 | 0 | 4.115427  | -1.318472 | 0.108379  |
| 29 | 6 | 0 | 4.828947  | -0.248928 | -0.385681 |
| 30 | 1 | 0 | 5.908685  | -0.306069 | -0.485661 |
| 31 | 6 | 0 | 4.137544  | 0.904784  | -0.807632 |
| 32 | 1 | 0 | 2.262287  | 1.873445  | -1.047237 |
| 33 | 1 | 0 | 4.682891  | 1.723969  | -1.267096 |
| 34 | 1 | 0 | 4.622214  | -2.238993 | 0.386241  |
| 35 | 6 | 0 | 0.561889  | -0.007466 | 0.086309  |
| 36 | 6 | 0 | -0.136996 | -1.219133 | 0.255280  |

**Table S6.** Cartesian coordinates of DPA-BN-BFT for ESPs and frontier orbitals calculations

| Center | Atomic | Atomic | Coordinates (Angstroms) |           |           |
|--------|--------|--------|-------------------------|-----------|-----------|
| Number | Number | Type   | X                       | Y         | Z         |
| 1      | 6      | 0      | -5.938324               | -3.150080 | 0.823343  |
| 2      | 6      | 0      | -6.966064               | -2.246122 | 0.534318  |
| 3      | 6      | 0      | -6.650940               | -0.948374 | 0.154507  |
| 4      | 6      | 0      | -5.319369               | -0.489522 | 0.043638  |
| 5      | 6      | 0      | -4.270482               | -1.417403 | 0.339601  |
| 6      | 6      | 0      | -4.620312               | -2.730668 | 0.724183  |
| 7      | 6      | 0      | -5.046055               | 0.917160  | -0.369055 |
| 8      | 6      | 0      | -6.103979               | 1.807379  | -0.662364 |
| 9      | 6      | 0      | -5.868800               | 3.122148  | -1.048128 |
| 10     | 1      | 0      | -6.711379               | 3.773720  | -1.264707 |
| 11     | 6      | 0      | -4.559451               | 3.604161  | -1.157943 |
| 12     | 6      | 0      | -3.505682               | 2.744520  | -0.874606 |
| 13     | 6      | 0      | -3.712541               | 1.407235  | -0.480623 |
| 14     | 1      | 0      | -6.165245               | -4.169659 | 1.122954  |
| 15     | 1      | 0      | -8.006720               | -2.550273 | 0.605137  |
| 16     | 1      | 0      | -3.834504               | -3.442983 | 0.953149  |
| 17     | 1      | 0      | -4.371813               | 4.630949  | -1.459775 |
| 18     | 1      | 0      | -2.489768               | 3.124692  | -0.963863 |
| 19     | 1      | 0      | -7.136142               | 1.485522  | -0.594494 |
| 20     | 1      | 0      | -7.474558               | -0.278408 | -0.059547 |
| 21     | 6      | 0      | -2.862882               | -1.000885 | 0.243926  |
| 22     | 6      | 0      | -1.790871               | -1.830749 | 0.500839  |
| 23     | 6      | 0      | -0.433146               | -1.397626 | 0.402219  |

|    |   |   |           |           |           |
|----|---|---|-----------|-----------|-----------|
| 24 | 6 | 0 | -0.125607 | -0.055879 | 0.031445  |
| 25 | 1 | 0 | 0.437508  | -3.290903 | 0.963453  |
| 26 | 1 | 0 | -1.926365 | -2.871348 | 0.793325  |
| 27 | 6 | 0 | 0.653944  | -2.267734 | 0.666028  |
| 28 | 6 | 0 | 1.210782  | 0.365544  | -0.075047 |
| 29 | 1 | 0 | -0.885466 | 1.743563  | -0.494996 |
| 30 | 6 | 0 | 2.261316  | -0.512148 | 0.197123  |
| 31 | 6 | 0 | 1.963352  | -1.849058 | 0.575821  |
| 32 | 1 | 0 | 1.421673  | 1.386698  | -0.376582 |
| 33 | 1 | 0 | 2.772550  | -2.533047 | 0.804591  |
| 34 | 7 | 0 | 3.602841  | -0.083175 | 0.114657  |
| 35 | 6 | 0 | 3.953654  | 1.264565  | 0.427821  |
| 36 | 6 | 0 | 3.495529  | 1.860954  | 1.613511  |
| 37 | 6 | 0 | 4.773709  | 2.002950  | -0.439067 |
| 38 | 6 | 0 | 3.845336  | 3.176300  | 1.917305  |
| 39 | 1 | 0 | 2.868682  | 1.290294  | 2.291577  |
| 40 | 6 | 0 | 5.132887  | 3.312944  | -0.119675 |
| 41 | 1 | 0 | 5.126150  | 1.547284  | -1.359146 |
| 42 | 6 | 0 | 4.668254  | 3.908317  | 1.056045  |
| 43 | 1 | 0 | 3.484460  | 3.624591  | 2.839030  |
| 44 | 1 | 0 | 5.768629  | 3.872492  | -0.800469 |
| 45 | 1 | 0 | 4.944672  | 4.930144  | 1.299344  |
| 46 | 6 | 0 | 4.621416  | -0.972714 | -0.335790 |
| 47 | 6 | 0 | 5.859233  | -1.019587 | 0.325789  |
| 48 | 6 | 0 | 4.407976  | -1.802656 | -1.448264 |
| 49 | 6 | 0 | 6.862587  | -1.878443 | -0.122067 |
| 50 | 1 | 0 | 6.028091  | -0.383474 | 1.189004  |
| 51 | 6 | 0 | 5.410699  | -2.672057 | -1.878300 |
| 52 | 1 | 0 | 3.458789  | -1.761503 | -1.973180 |
| 53 | 6 | 0 | 6.643903  | -2.712973 | -1.222031 |
| 54 | 1 | 0 | 7.814768  | -1.903650 | 0.400941  |
| 55 | 1 | 0 | 5.229881  | -3.308385 | -2.740394 |
| 56 | 1 | 0 | 7.425129  | -3.385616 | -1.563965 |
| 57 | 7 | 0 | -1.169537 | 0.804408  | -0.236117 |
| 58 | 5 | 0 | -2.550518 | 0.436735  | -0.165638 |

**Table S7.** Cartesian coordinates of DMA-DPA-BN-BFT for ESPs calculation

| Center Number | Atomic Number | Atomic Type | Coordinates (Angstroms) |           |           |
|---------------|---------------|-------------|-------------------------|-----------|-----------|
|               |               |             | X                       | Y         | Z         |
| 1             | 6             | 0           | 7.039422                | -3.474223 | -0.870921 |
| 2             | 6             | 0           | 8.085718                | -2.613052 | -0.522362 |
| 3             | 6             | 0           | 7.798173                | -1.321134 | -0.103129 |
| 4             | 6             | 0           | 6.477963                | -0.826223 | -0.010152 |
| 5             | 6             | 0           | 5.409392                | -1.710882 | -0.365286 |
| 6             | 6             | 0           | 5.732067                | -3.019633 | -0.789287 |
| 7             | 6             | 0           | 6.234602                | 0.572515  | 0.444349  |
| 8             | 6             | 0           | 7.310226                | 1.424327  | 0.785320  |
| 9             | 6             | 0           | 7.103172                | 2.731518  | 1.210334  |
| 10            | 1             | 0           | 7.958663                | 3.352762  | 1.462699  |
| 11            | 6             | 0           | 5.805018                | 3.245079  | 1.312683  |
| 12            | 6             | 0           | 4.734446                | 2.424109  | 0.982035  |
| 13            | 6             | 0           | 4.912368                | 1.094756  | 0.548084  |
| 14            | 1             | 0           | 7.244284                | -4.488833 | -1.202043 |
| 15            | 1             | 0           | 9.118489                | -2.946125 | -0.577204 |
| 16            | 1             | 0           | 4.931987                | -3.699851 | -1.062528 |
| 17            | 1             | 0           | 5.639150                | 4.266380  | 1.644586  |
| 18            | 1             | 0           | 3.727541                | 2.829367  | 1.064030  |
| 19            | 1             | 0           | 8.334679                | 1.077482  | 0.723033  |
| 20            | 1             | 0           | 8.634873                | -0.684745 | 0.157996  |
| 21            | 6             | 0           | 4.013465                | -1.257387 | -0.285417 |
| 22            | 6             | 0           | 2.922369                | -2.044714 | -0.601270 |
| 23            | 6             | 0           | 1.577865                | -1.579346 | -0.511675 |
| 24            | 6             | 0           | 1.295105                | -0.247070 | -0.086006 |
| 25            | 1             | 0           | 0.662168                | -3.418000 | -1.175765 |
| 26            | 1             | 0           | 3.036403                | -3.075280 | -0.936670 |
| 27            | 6             | 0           | 0.469615                | -2.402941 | -0.836027 |
| 28            | 6             | 0           | -0.028568               | 0.209106  | 0.012180  |
| 29            | 1             | 0           | 2.094462                | 1.504980  | 0.532856  |
| 30            | 6             | 0           | -1.105963               | -0.624544 | -0.313765 |
| 31            | 6             | 0           | -0.828181               | -1.954551 | -0.747949 |
| 32            | 1             | 0           | -0.212338               | 1.222882  | 0.352359  |
| 33            | 1             | 0           | -1.648360               | -2.608227 | -1.019730 |
| 34            | 7             | 0           | -2.426124               | -0.173762 | -0.233424 |
| 35            | 6             | 0           | -2.734051               | 1.225036  | -0.233982 |



|    |   |   |           |           |           |
|----|---|---|-----------|-----------|-----------|
| 36 | 6 | 0 | -2.338019 | 2.053395  | -1.292826 |
| 37 | 6 | 0 | -3.476718 | 1.798002  | 0.805604  |
| 38 | 6 | 0 | -2.652367 | 3.408368  | -1.306054 |
| 39 | 1 | 0 | -1.776132 | 1.630475  | -2.120894 |
| 40 | 6 | 0 | -3.813073 | 3.148429  | 0.794874  |
| 41 | 1 | 0 | -3.808096 | 1.174281  | 1.631026  |
| 42 | 6 | 0 | -3.394922 | 4.001635  | -0.255232 |
| 43 | 1 | 0 | -2.327655 | 4.002274  | -2.151857 |
| 44 | 1 | 0 | -4.399562 | 3.538127  | 1.618104  |
| 45 | 6 | 0 | -3.509573 | -1.092416 | -0.052319 |
| 46 | 6 | 0 | -4.617100 | -1.067814 | -0.909292 |
| 47 | 6 | 0 | -3.516432 | -2.012418 | 1.004673  |
| 48 | 6 | 0 | -5.692262 | -1.931512 | -0.725352 |
| 49 | 1 | 0 | -4.641467 | -0.353797 | -1.727809 |
| 50 | 6 | 0 | -4.577187 | -2.893843 | 1.188125  |
| 51 | 1 | 0 | -2.678924 | -2.038582 | 1.696202  |
| 52 | 6 | 0 | -5.697516 | -2.886112 | 0.321431  |
| 53 | 1 | 0 | -6.529069 | -1.864700 | -1.410012 |
| 54 | 1 | 0 | -4.534837 | -3.581438 | 2.024121  |
| 55 | 7 | 0 | 2.358278  | 0.570584  | 0.238183  |
| 56 | 5 | 0 | 3.730863  | 0.168172  | 0.176321  |
| 57 | 7 | 0 | -6.746523 | -3.779219 | 0.484594  |
| 58 | 7 | 0 | -3.689626 | 5.357555  | -0.250507 |
| 59 | 6 | 0 | -7.969131 | -3.589323 | -0.282914 |
| 60 | 1 | 0 | -8.669901 | -4.389290 | -0.038631 |
| 61 | 1 | 0 | -8.458803 | -2.624913 | -0.074187 |
| 62 | 1 | 0 | -7.769476 | -3.641787 | -1.359374 |
| 63 | 6 | 0 | -6.821590 | -4.572870 | 1.703026  |
| 64 | 1 | 0 | -7.696504 | -5.222796 | 1.650572  |
| 65 | 1 | 0 | -5.938999 | -5.214141 | 1.809475  |
| 66 | 1 | 0 | -6.904217 | -3.954303 | 2.610668  |
| 67 | 6 | 0 | -4.640161 | 5.874508  | 0.723821  |
| 68 | 1 | 0 | -4.736310 | 6.953009  | 0.588845  |
| 69 | 1 | 0 | -5.640176 | 5.423017  | 0.625884  |
| 70 | 1 | 0 | -4.288276 | 5.699229  | 1.746941  |
| 71 | 6 | 0 | -3.455612 | 6.140870  | -1.455458 |
| 72 | 1 | 0 | -3.723923 | 7.180582  | -1.261177 |
| 73 | 1 | 0 | -2.396785 | 6.120396  | -1.737952 |

|    |   |   |           |          |           |
|----|---|---|-----------|----------|-----------|
| 74 | 1 | 0 | -4.044610 | 5.786724 | -2.316272 |
|----|---|---|-----------|----------|-----------|

### Reference

- S1.** G. M. Sheldrick. SHELXS-90/96, Program for Structure Solution, *Acta. Crystallogr. Sect. A* **1990**, *46*, 467.
- S2.** H. N. Huang, Y. Zhou, Y. W. Wang, X. H. Cao, C. Han, G. C. Liu, Z. X. Xu, C. C. Zhan, H. H. Hu, Y. Peng, P. Yan, D. P. Cao, *J. Mater. Chem. A*, **2020**, **8**, 22023-22031.

## Scanned NMR Spectra for the New Compounds

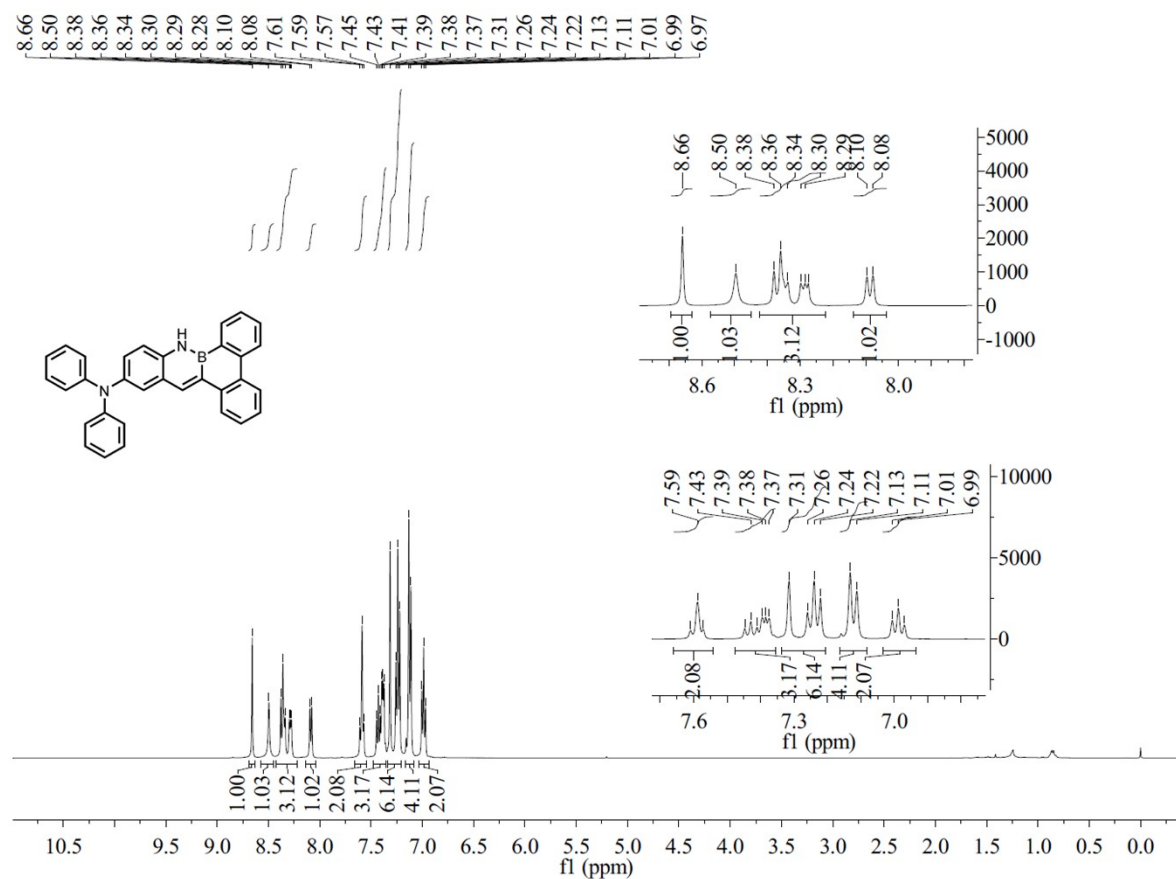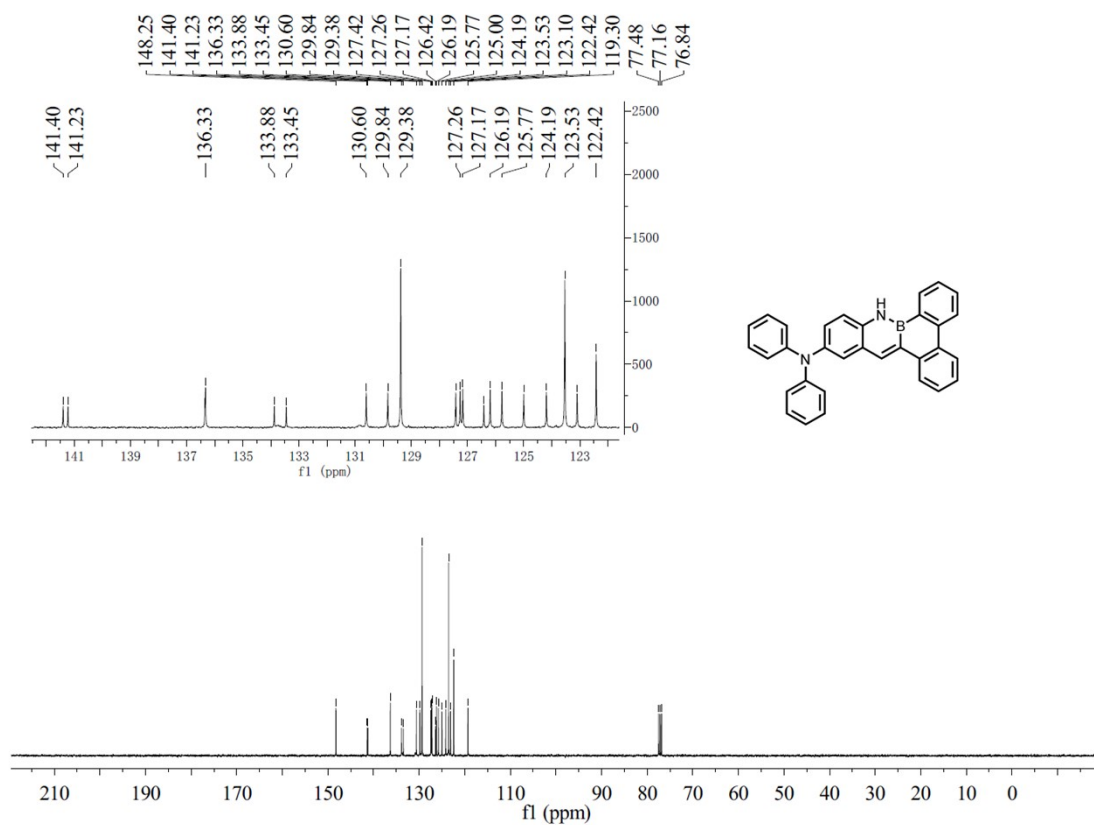



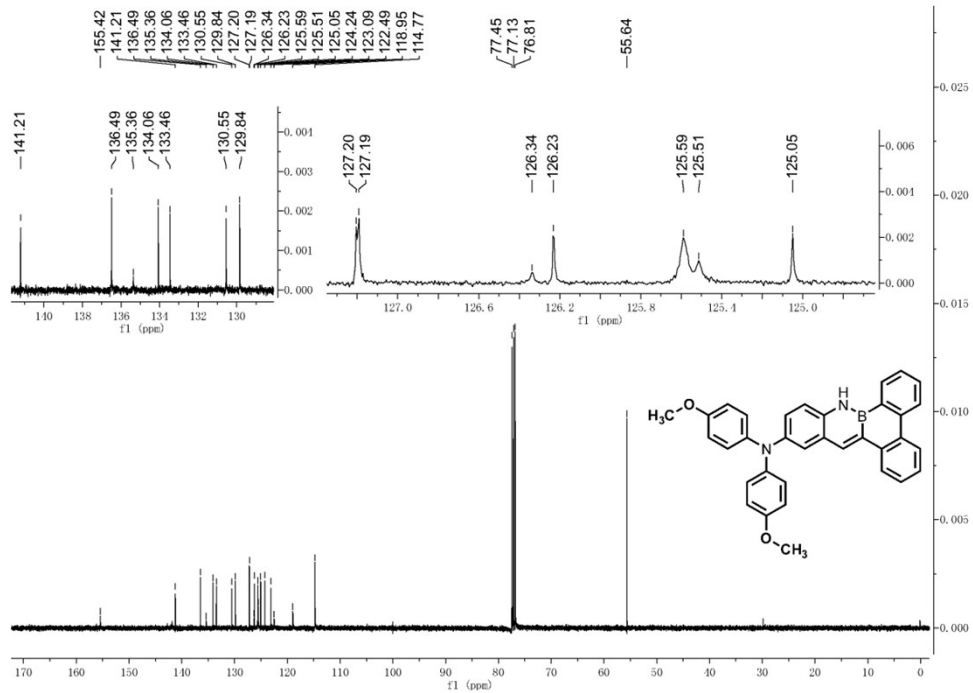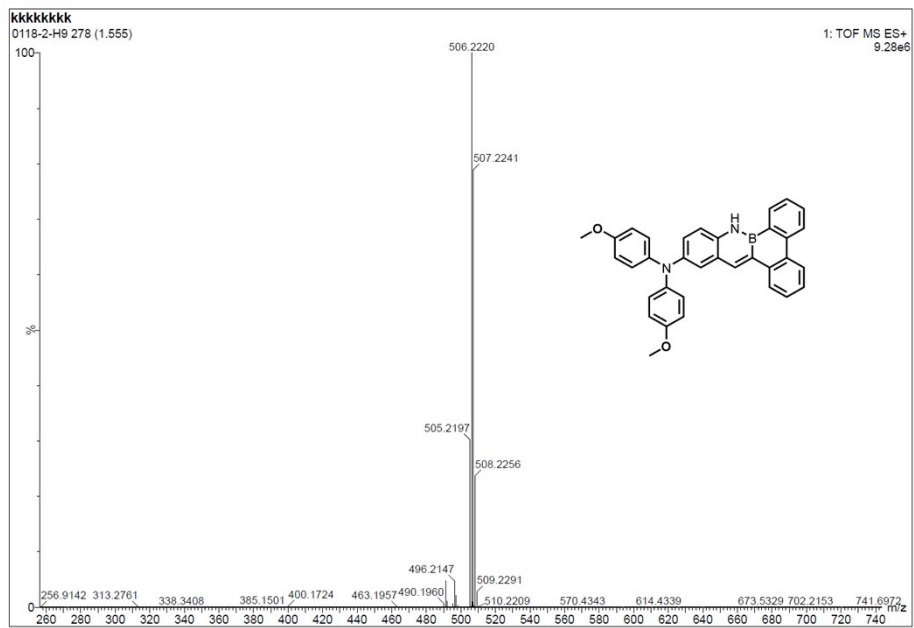

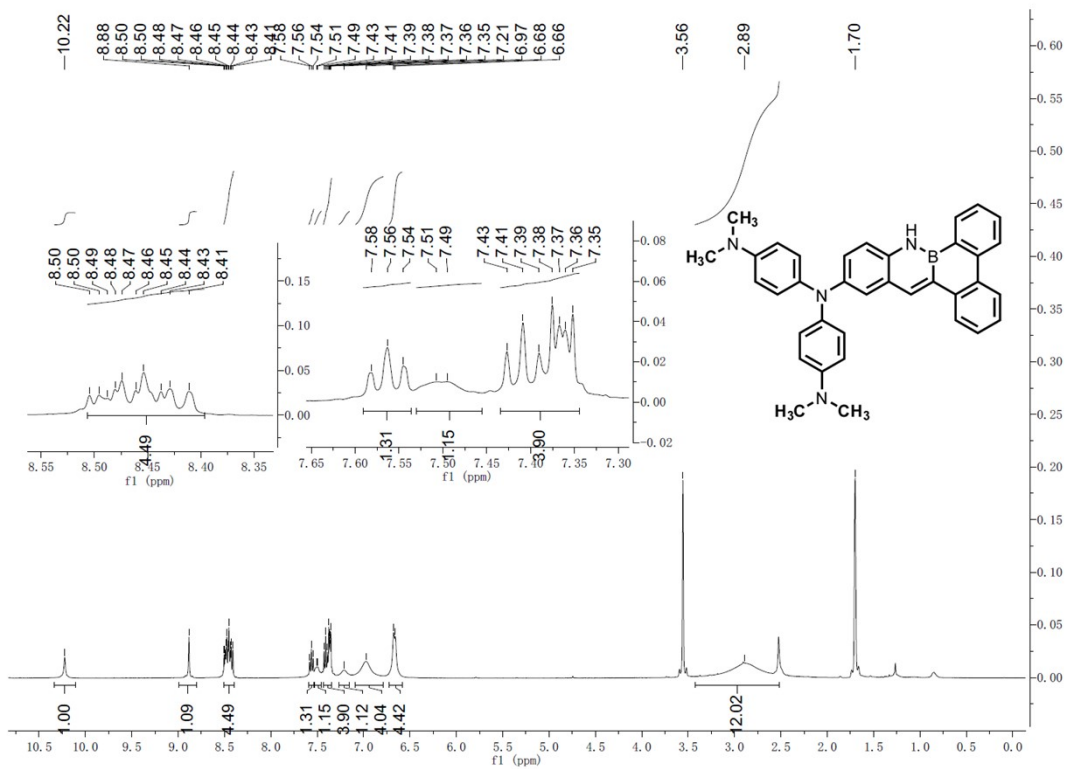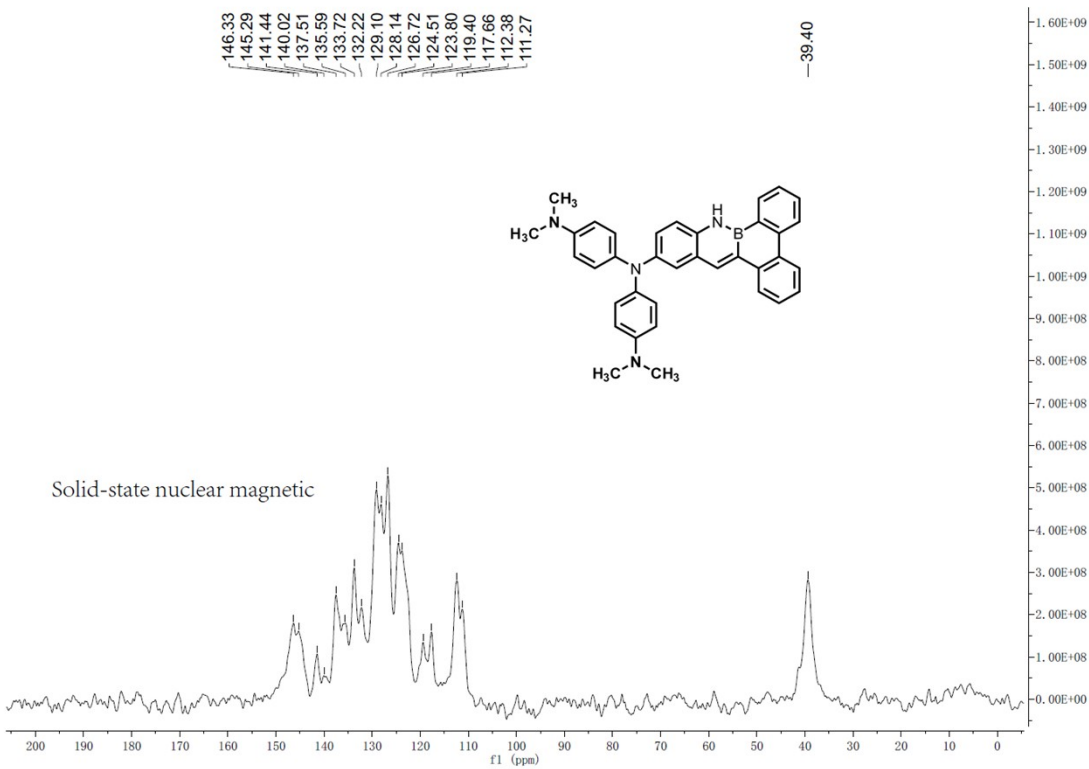

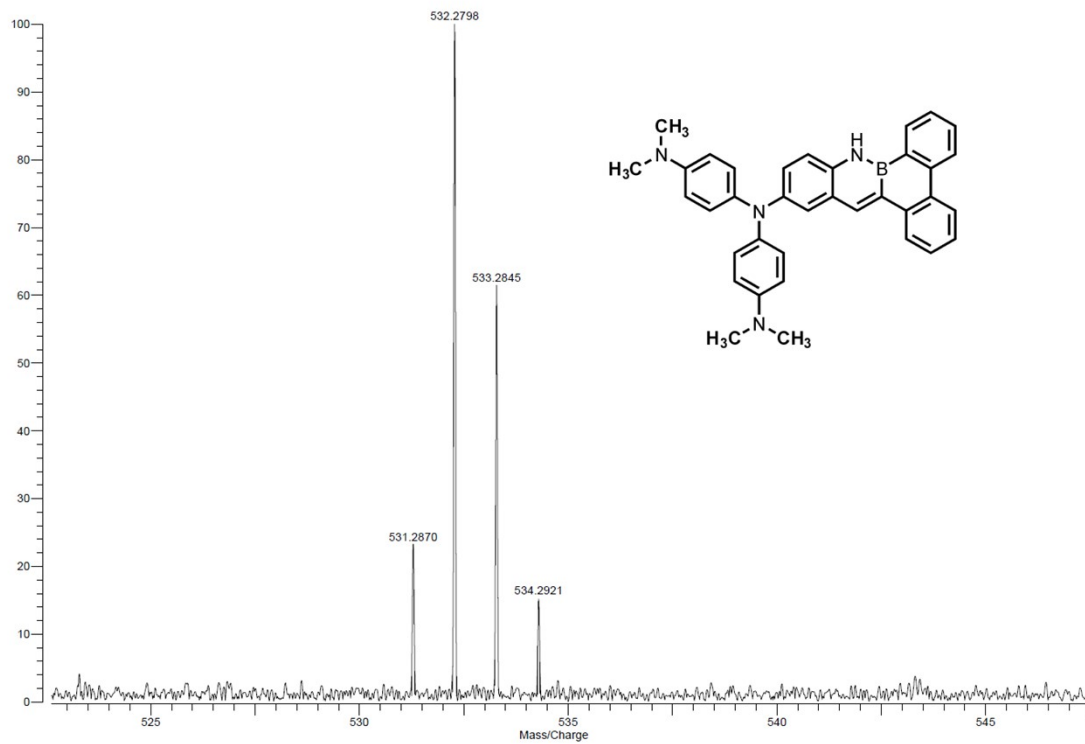

Supplement: d2sc00380e2.pdf [file d2sc00380e2.pdf]
